# Supplementary material
Source: Springer Nature journal article supplement (https://www.springermedizin.de/resource/supplementary/13058_2010_9489_MOESM9_ESM.pdf/9702258)

**A**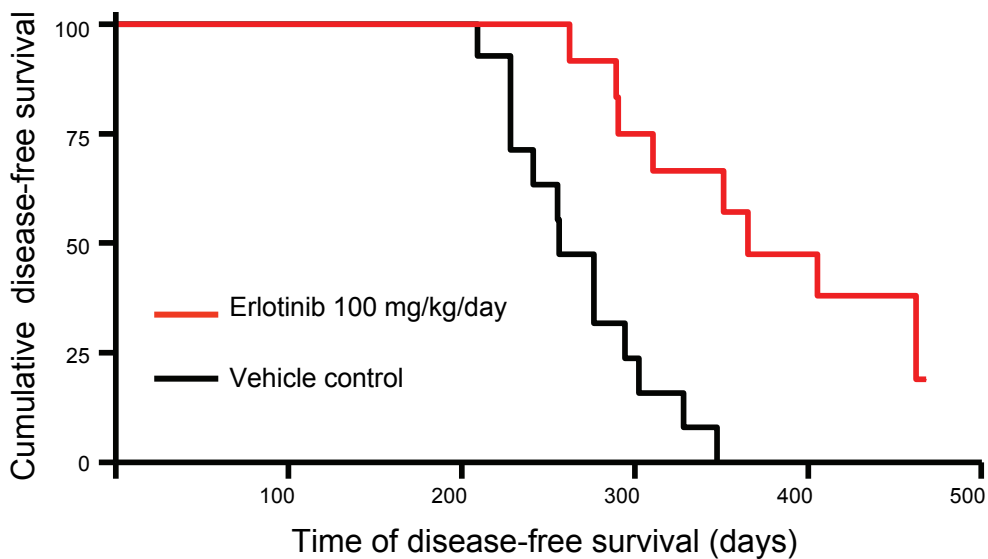**B**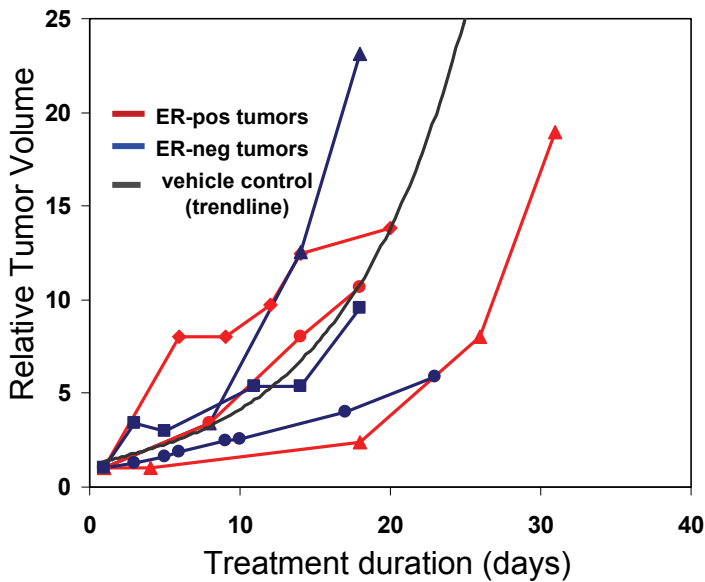

Supplement: MOESM9 [file 9702258]
